# Supplementary material for: Cranial Base Synchondrosis Lacks PTHrP-Expressing Column-Forming Chondrocytes
Source: MDPI journal article supplement (doi:10.3390/ijms23147873), 2022-07-17
Supplement: s1 [file s1]

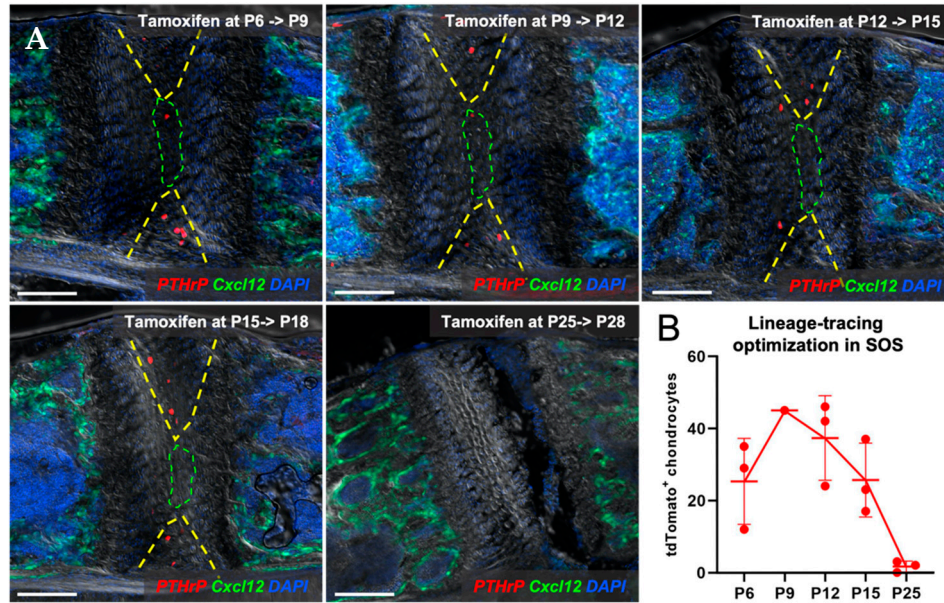

**Figure S1.** *Pthrp-creER* marks chondrocytes in the lateral wedge-shaped area of the synchondrosis. (A) *Pthrp-creER*; *R26RtdTomato* mice were pulsed at P6, P9, P12, P15 and P25, and the SOS was analyzed at 72 h later at P9, P12, P15, P18 and P28, respectively. Yellow dotted lines: wedge-shaped areas, green dotted lines: central hypertrophic zone. Arrowheads: tdTomato<sup>+</sup> cells in the resting zone. Red: tdTomato, blue: DAPI, gray: DIC, green: *Cxcl12-GFP*. Scale bars: 100 μm. (B) Quantification of tdTomato<sup>+</sup> chondrocytes in SOS. x-axis: day of tamoxifen pulse. y-axis: tdTomato<sup>+</sup> chondrocytes. The number of tdTomato<sup>+</sup> chondrocytes was counted at 72 hours after the initial pulse.  $n = 1-3$  for each group/timepoint. Data are present as the mean ± S.D.
